# Supplementary material for: New breast cancer prognostic factors identified by computer-aided image analysis of HE stained histopathology images
Source: PubMed Central journal article supplement (PMC4448264; doi:10.1038/srep10690), 2015-05-29
Supplement: srep10690-s1.pdf [file srep10690-s1.pdf]

## New breast cancer prognostic factors identified by computer-aided image analysis of HE stained histopathology images

Jia-Mei Chen<sup>1</sup>, Ai-Ping Qu<sup>2</sup>, Lin-Wei Wang<sup>1</sup>, Jing-Ping Yuan<sup>1</sup>, Fang Yang<sup>1</sup>, Qing-Ming Xiang<sup>1</sup>,  
Ninu Maskey<sup>3</sup>, Gui-Fang Yang<sup>3</sup>, Juan Liu<sup>2</sup>\*, Yan Li<sup>1</sup>.\*

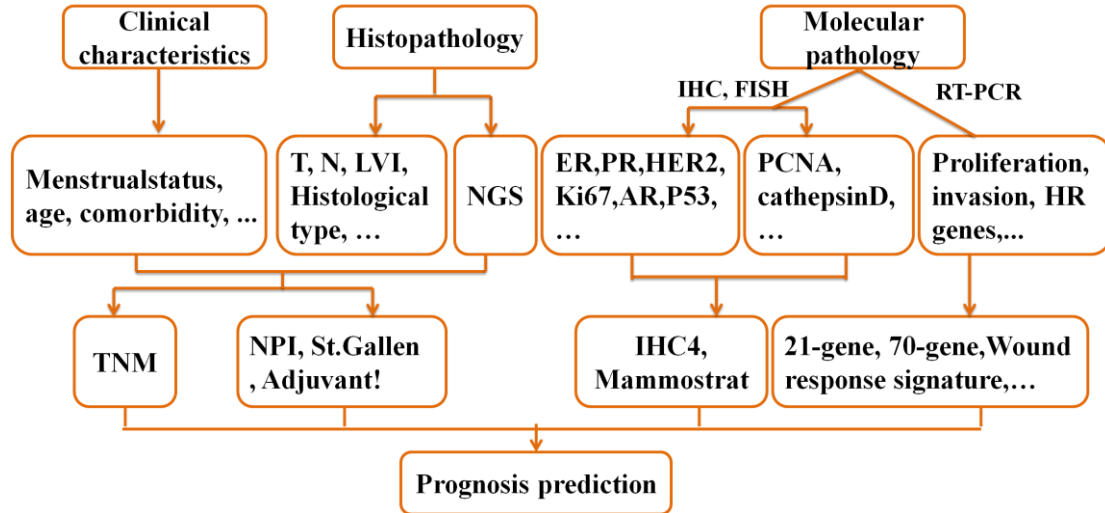

**Figure S1 | Overview of breast cancer prognostic prediction tools in current clinical study.** These tools generally integrated information on clinical characteristics, gross pathology, histopathology and molecular pathology. Abbreviations: IHC (immunohistochemistry), FISH (fluorescence in situ hybridization), RT-PCR (reverse transcription-polymerase chain reaction), T (tumor size), N (lymph node status), LVI (lymph-vascular space invasion), NGS (Nottingham grading system), ER (estrogen receptor), PR (progesterone receptor), HER2 (human epidermal growth factor receptor 2), HR (hormone receptor), AR (androgen receptor), PCNA (proliferating cell nuclear antigen), NPI (Nottingham Prognosis Index), IHC4 (ER, PR, HER2, and Ki-67), Mammostrat (p53, HTF9C, CEACAM5, NDRG1 and SLC7A5).

**Table S2. Multiple level image features extracted from HE histopathology images**

| Feature level         | Features                                                                                  | Feature number |
|-----------------------|-------------------------------------------------------------------------------------------|----------------|
| Pixel-level features  |                                                                                           | 400            |
| Intensity             | smoothness, third moment, consistency                                                     | 6              |
| Color                 | average and standard deviation of the gray-scale image and the RGB color image components | 6              |
| Texture               | LBP, Haralick, LBPBF, GLRM, GLCM                                                          | 388            |
| Object-level features |                                                                                           | 314            |
| Morphometry           | average, standard deviation, maximum and minimum                                          | 214            |

|                         |                                                                                                                                                                                                                                                |     |
|-------------------------|------------------------------------------------------------------------------------------------------------------------------------------------------------------------------------------------------------------------------------------------|-----|
|                         | of each image object area, perimeter, size, eccentricity, solidity, circularity, convex area, the major and minor axis of the ellipse, fractal dimensions                                                                                      |     |
| Topological             | Voronoi diagrams, Delaunay triangulation, Minimum spanning tree, and the Ripleys K function of cell nuclei                                                                                                                                     | 100 |
| Semantic-level features | nest area to stroma area ratio, area-perimeter ratio of tumor nests and stroma, nuclei- cytoplasm ratio, tumor nests cell density, stroma round cell density, stroma non round cell density, nest cell nuclei to stroma cell nuclei area ratio | 16  |

LBP: local binary patterns; LBPH: the rotation invariant local binary patterns with histogram Fourier transform; GLRM: gray-level run-length matrix; GLCM: gray-level co-occurrence matrix

**Table S3. Total variance explained of principal component analysis.**

| Component               | Initial eigenvalues |          |            | Extraction sums of squared loadings |          |            | KMO   |
|-------------------------|---------------------|----------|------------|-------------------------------------|----------|------------|-------|
|                         | Total               | % of     | Cumulative | Total                               | % of     | Cumulative |       |
|                         |                     | Variance | %          |                                     | Variance | %          |       |
| TNs feature             |                     |          |            |                                     |          |            |       |
| Z1                      | 3.288               | 65.756   | 65.756     | 3.288                               | 65.756   | 65.756     | 0.778 |
| Z2                      | 0.945               | 18.901   | 84.657     |                                     |          |            |       |
| Z3                      | 0.425               | 8.494    | 93.151     |                                     |          |            |       |
| Z4                      | 0.253               | 5.062    | 98.213     |                                     |          |            |       |
| Z5                      | 0.089               | 1.787    | 100.000    |                                     |          |            |       |
| TNs cell nuclei feature |                     |          |            |                                     |          |            |       |
| Z1                      | 1.911               | 47.771   | 47.771     | 1.911                               | 47.771   | 47.771     | 0.539 |
| Z2                      | 0.997               | 24.923   | 72.694     |                                     |          |            |       |
| Z3                      | 0.881               | 22.035   | 94.729     |                                     |          |            |       |
| Z4                      | 0.211               | 5.271    | 100.000    |                                     |          |            |       |

TNs: cancer cell group with various geometrical and morphological features is called tumor nests (TNs); KMO: Kaiser-Meyer-Olkin measure of sampling adequacy.

**Table S4. The component score coefficient matrix of principal component analysis.**

| Features | Component Z1 |
|----------|--------------|
|          |              |

---

| TNs feature*                              |        |
|-------------------------------------------|--------|
| TNs number                                | 0.260  |
| TNs perimeter sum                         | 0.107  |
| TNs area average                          | -0.281 |
| TNs area variance                         | -0.272 |
| TNs area/perimeter ratio                  | 0.268  |
| TNs cell nuclei feature <sup>#</sup>      |        |
| TNs cell nuclei area eccentricity maximum | 0.048  |
| TNs cell nuclei area average              | 0.482  |
| TNs cell nuclei area variance             | 0.478  |
| TNs cell nuclei area/TNs area ratio       | 0.246  |

---

\*TNs feature =  $0.260 \times \text{TNs number} + 0.107 \times \text{TNs perimeter sum} - 0.281 \times \text{area average} - 0.272 \times \text{TNs area variance} - 0.268 \times \text{TNs area/perimeter ratio}$ ; <sup>#</sup>TNs cell nuclei feature =  $0.048 \times \text{TNs cell nuclei area eccentricity maximum} + 0.482 \times \text{TNs cell nuclei area average} + 0.478 \times \text{TNs cell nuclei area variance} + 0.246 \times \text{TNs cell nuclei area/TNs area ratio}$ .
